# Supplementary material
Source: PubMed Central journal article supplement (PMC535091)
Supplement: 7600479s2.pdf [file 7600479s2.pdf]

**A**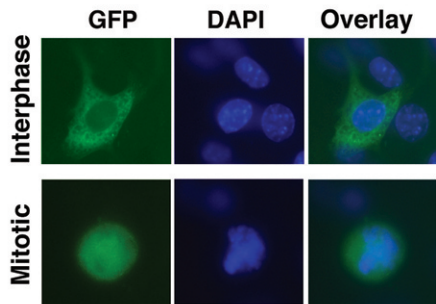**B**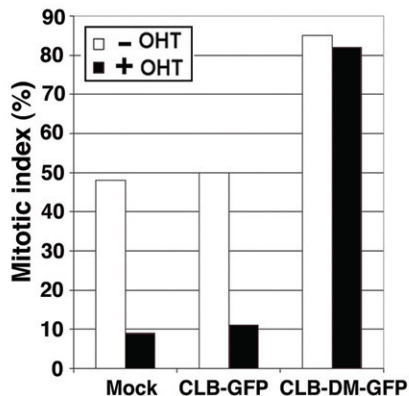

**Supplementary Figure S2** Ectopic expression of non-degradable cyclin B arrests Trrap-deficient cells at mitosis. (A) CER9 cells were transfected with expression vectors for cyclin B-GFP and images were taken by a fluorescent microscope. Examples of GFP-positive cells with condensed chromosomes (mitotic) or decondensed chromatin (interphase) are shown. (B) CER9 cells, pre-incubated in the presence or absence of OHT for 24 h, were transfected with expression vectors CLB-GFP or CLB-DM-GFP. 72 h after transfection, nocodazole was added and cultured for further 10 h. The mitotic index (%) was calculated as the ratio of GFP-positive cells with condensed chromosomes (mitotic) to those with decondensed chromatin (interphase). At least 100 GFP-positive cells were scored for each sample. Data are means of duplicate samples and are representative of two independent experiments.
